# Supplementary material for: The potential role of borophene as a radiosensitizer in boron neutron capture therapy (BNCT) and particle therapy (PT)
Source: Royal Society of Chemistry journal article supplement (doi:10.1039/d0bm00318b), 2020-01-01
Supplement: d0bm00318b1.pdf [file d0bm00318b1.pdf]

## **Potential role of Borophene as radiosensitizer in Boron Neutron**

### **Capture Therapy (BNCT) and Particle Therapy (PT)**

**Pengyuan Qi\***, **Qianyuan Chen\***, **Dong Tu**, **Songhuan Yao**, **Yupeng Zhang**, **Jike Wang**, **Conghua Xie<sup>+</sup>**, **Chunxu Pan<sup>+</sup>**, **Hao Peng<sup>+</sup>**

\*The two authors contributed equally to this work.

#### **<sup>+</sup>Corresponding Authors:**

Conghua Xie, PhD, Department of Radiation and Medical Oncology, Zhongnan Hospital of Wuhan University, 169 Donghu Road, Wuhan, Hubei 430071, China; email: chxie\_65@whu.edu.cn.

Chunxu Pan, PhD, School of Physics and Technology, Wuhan University, 299 Bayi Rd, Wuhan 430072, China. Tel: 86-27-68752481-8031. E-mail: cxpan@whu.edu.cn.

Hao Peng, PhD, Department of Medical Physics, Wuhan University, Luojiashan Rd, China 430072. Tel: 86-27-68752161. E-mail: penghao@whu.edu.cn.

---

## Supporting Information

**Fig. S2** has been updated on the 16/03/2021.

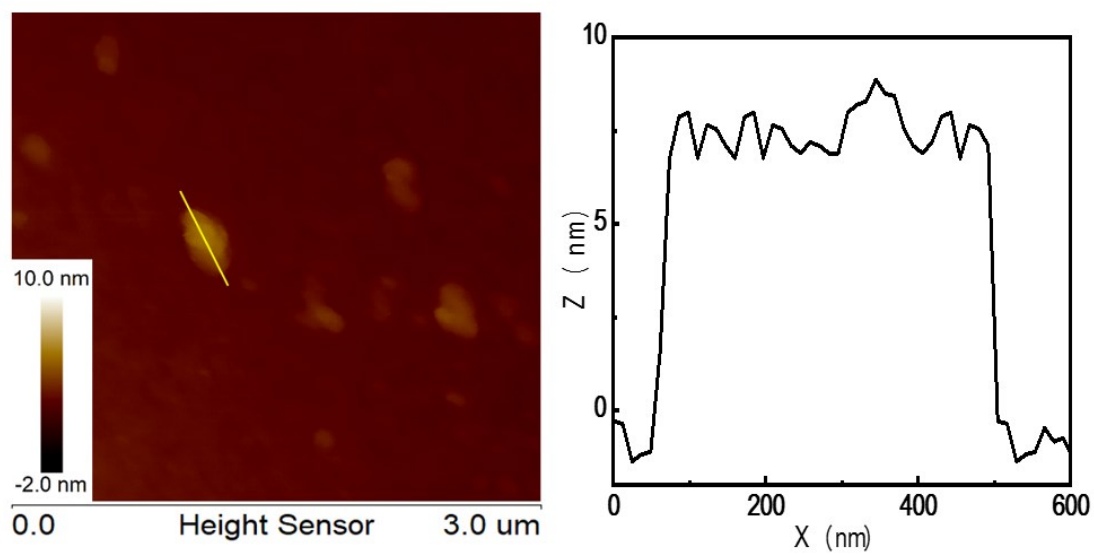

**Fig. S1.** AFM characterization of the borophene obtained by ball milling-assisted sonochemical exfoliation.

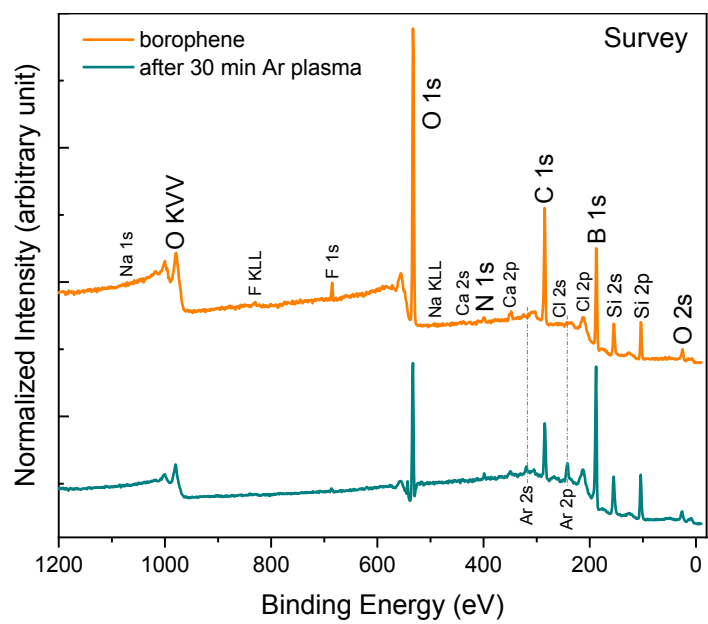

**Fig. S2.** XPS characterization of the borophene obtained by ball milling-assisted sonochemical exfoliation.

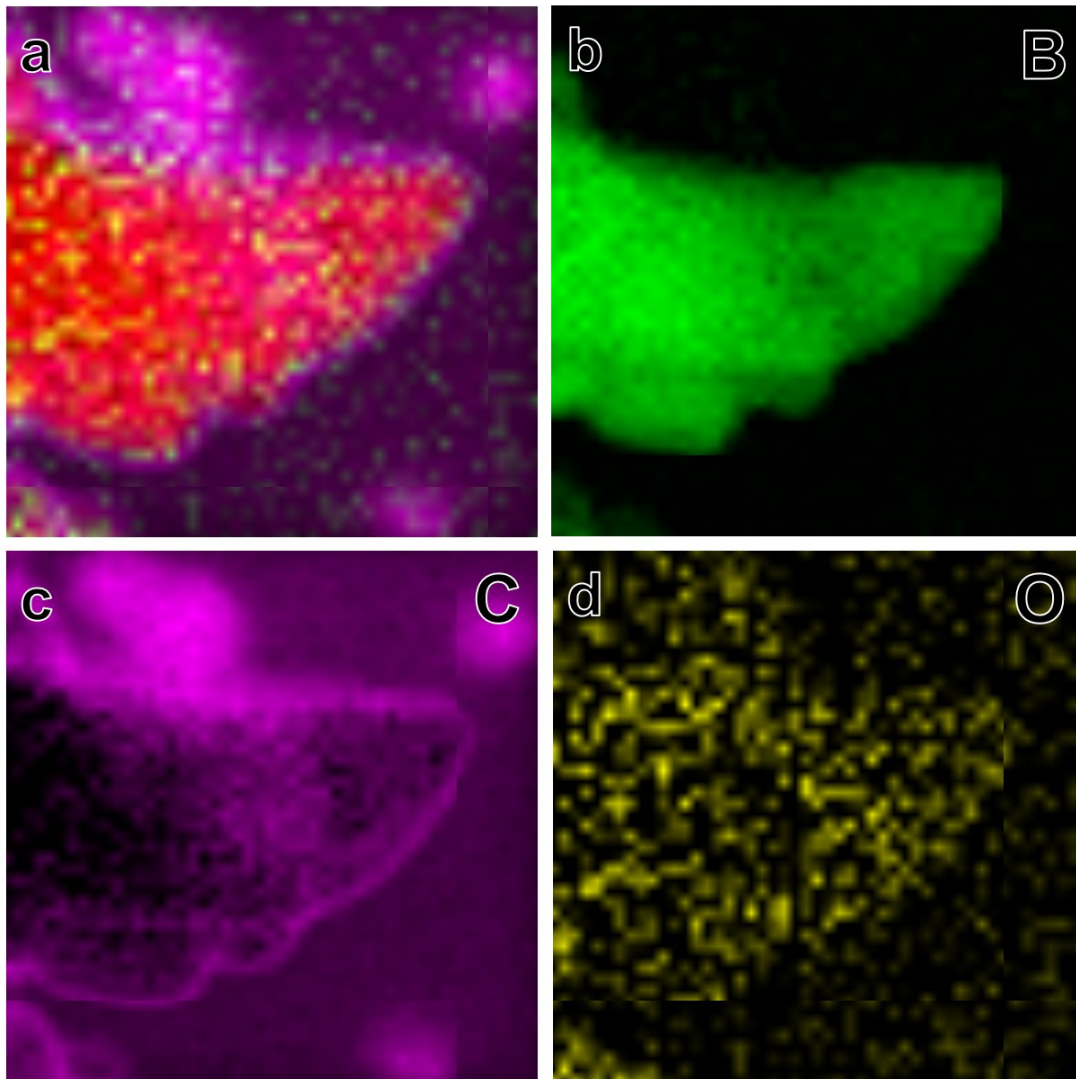

**Fig. S3.** EELS mapping of borophene.
